# Supplementary material for: Cu(ii) conjugation along the transformation of a vitamin K3derivative to a dinaphthoquinone methide radical
Source: Royal Society of Chemistry journal article supplement (doi:10.1039/c3nj00783a), 2013-10-11
Supplement: c3nj00783a.pdf [file c3nj00783a.pdf]

## Supporting Information

### Cu(II) conjugation along the transformation of Vitamin K<sub>3</sub> derivative to dinaphthoquinone methide radical

Kirti D. Badave,<sup>a</sup> Shalaka S. Patil,<sup>b</sup> Ayesha A. Khan,<sup>b</sup> Darbha Srinivas,<sup>c</sup> Raymond J. Butcher,<sup>d</sup> Rajesh G. Gonnade,<sup>e</sup> Vedavati G. Puranik,<sup>e</sup> Rahul V. Pinjari,<sup>a</sup> Shridhar P. Gejji<sup>a</sup> and Sandhya Y. Rane<sup>a,\*</sup>

<sup>a</sup> Department of Chemistry, University of Pune, Pune-411007, India.

<sup>b</sup> Institute of Bioinformatics and Biotechnology, University of Pune, Pune-411007, India.

<sup>c</sup> Catalysis Division, National Chemical Laboratory, Pune-411008, India.

<sup>d</sup> Chemistry Department, Howard University, D.C. 20059, USA.

<sup>e</sup> Centre for Material Characterization, National Chemical Laboratory, Pune-411008, India.

E-mail: syrane@chem.unipune.ac.in

| Table of Contents                                                                                                                                                       |    |
|-------------------------------------------------------------------------------------------------------------------------------------------------------------------------|----|
| GSH activity calculations                                                                                                                                               | S2 |
| Table S1: Data on Crystal data and structure refinement for 1,1'-methide-bi-Vitamin K <sub>3</sub> , An outline to calculate Lattice energies has also been presented.  | S3 |
| Cu estimation results.<br>ORTEP of 1,1'-methide-bi-Vitamin K <sub>3</sub> ( <b>B</b> ) and elemental analyses                                                           | S4 |
| Figure S1: The numbering scheme in <b>B</b> .                                                                                                                           | S5 |
| Figure S2: Correlation diagram between the energy eigenvalues of selected MOs,                                                                                          | S6 |
| Figure S3: The MOs in <b>B</b> (neutral) and <b>B</b> (radical) forms.                                                                                                  | S6 |
| Table S2: The Fermi contact coupling constant (FC) (in G) for atoms in the radical form.                                                                                | S7 |
| Figure S4: Frozen glass X-band ESR spectrum of <b>B</b> in DMSO at 70 K.                                                                                                | S8 |
| Figure S5: (a) Plot of $\mu_{\text{eff}}$ (BM) vs. T (K) and (b) Plot of $\chi_m^{\text{corr}} \cdot T$ (cm <sup>3</sup> mol <sup>-1</sup> · K) vs. T (K) of <b>B</b> . | S9 |

### **GSH activity calculations:**

1. The net rate of decrease in  $A_{340}$  for the sample was calculated by subtracting the rate observed for a blank (where water is used instead of sample) from the rate observed for each sample.

2. The net  $A_{340}$  /min for the test sample was converted to NADPH consumed using the following relationship:

1 unit of Glutathione Reductase causes the formation of 1 mmol NADP + form NADPH per min at pH 7.0 at 25° C.

Extinction coefficient for NADPH is  $0.00622 \text{ mM}^{-1} \text{ cm}^{-1}$  at 340 nm.

3. Activity of GR is expressed as International Unit/Liter (U/L) of the sample or in terms of the protein or hemoglobin content.

4. A theoretical unique factor is determined to convert change in absorbance per minute ( $\Delta$ /min) to the corresponding units of enzyme activity. This factor is calculated using the following equation:

$U/L = \Delta A/\text{minute} \times F$ ; where  $F =$  factor

$F = (TV/SV) \times 10^3 / 6.22$ , where

TV = Total Volume in ml

SV = Sample Volume in ml

$10^3 =$  converts ml to L

6.22 = millimolar absorbance coefficient

For this assay, with a 1 cm light path, the factor calculates to be 4455. This factor can be programmed into the spectrophotometer and the machine directly converts the change in absorbance at 340 nm ( $\Delta A/\text{min}$ ) to activity in U/L, or alternately, results can be calculated manually.

**Table S1. Crystal data and structure refinement for 1,1'-methide-bi-Vitamin K<sub>3</sub>.**

|                                   |                                                |                 |
|-----------------------------------|------------------------------------------------|-----------------|
| Identification code               | 1,1'-methide-bi-Vitamin K <sub>3</sub>         |                 |
| Empirical formula                 | C <sub>22</sub> H <sub>16</sub> O <sub>2</sub> |                 |
| Formula weight                    | 312.35                                         |                 |
| Temperature                       | 123(2) K                                       |                 |
| Wavelength                        | 1.54184 Å                                      |                 |
| Crystal system                    | Triclinic                                      |                 |
| Space group                       | <i>P</i> -1̄                                   |                 |
| Unit cell dimensions              | a = 7.5080(4) Å                                | α = 82.421(5)°. |
|                                   | b = 9.0339(7) Å                                | β = 87.073(4)°. |
|                                   | c = 12.3483(7) Å                               | γ = 65.899(6)°. |
| Volume                            | 757.85(8) Å <sup>3</sup>                       |                 |
| Z                                 | 2                                              |                 |
| Density (calculated)              | 1.369 Mg/m <sup>3</sup>                        |                 |
| Absorption coefficient            | 0.685 mm <sup>-1</sup>                         |                 |
| F(000)                            | 328                                            |                 |
| Crystal size                      | 0.54 x 0.18 x 0.08 mm <sup>3</sup>             |                 |
| Theta range for data collection   | 5.40 to 73.60°.                                |                 |
| Index ranges                      | -9 ≤ h ≤ 6, -11 ≤ k ≤ 10, -14 ≤ l ≤ 15         |                 |
| Reflections collected             | 4872                                           |                 |
| Independent reflections           | 2978 [R(int) = 0.0152]                         |                 |
| Completeness to theta = 67.50°    | 99.8 %                                         |                 |
| Absorption correction             | Semi-empirical from equivalents                |                 |
| Max. and min. transmission        | 1.00000 and 0.81280                            |                 |
| Refinement method                 | Full-matrix least-squares on F <sup>2</sup>    |                 |
| Data / restraints / parameters    | 2978 / 0 / 219                                 |                 |
| Goodness-of-fit on F <sup>2</sup> | 1.068                                          |                 |
| Final R indices [I > 2σ(I)]       | R1 = 0.0489, wR2 = 0.1381                      |                 |
| R indices (all data)              | R1 = 0.0523, wR2 = 0.1420                      |                 |
| Largest diff. peak and hole       | 0.400 and -0.193 e.Å <sup>-3</sup>             |                 |
| CCDC                              | 801765                                         |                 |

### Lattice energy calculations:

The inspection of crystal structure from PLATON using KPI (Kitaigorodskii packing index) function revealed a high value for packing index (73.0%). The lattice energies using the OPIX program<sup>[18b]</sup> turns out to be -181.0 kJ mol<sup>-1</sup>. These were obtained by adding atom–atom pair-wise potential energies derived from the UNI force field.<sup>[a, b]</sup> The contribution of intermolecular interaction from C20–H20···O1 interactions to the lattice energies was estimated to be -22.3 kJ mol<sup>-1</sup> which is in the range of those reported in the literature.<sup>[c, d]</sup> The π···π interactions those stem from zipping of two layers engaging both rings of naphthoquinone (Cg···Cg = 3.904(1) Å) have intermolecular potential of -57.3 kJ mol<sup>-1</sup>. The assessment of intermolecular potentials associated with π···π interactions between the benzenoidal phenyl rings within the layered assembly (Cg···Cg = 3.531(1) Å) and stitching of the layered structure (Cg···Cg = 3.604(1) Å) were found to be -42.1 kJ mol<sup>-1</sup> and -39.2 kJ mol<sup>-1</sup> respectively. These values point to the unusual strength of π···π interactions in molecular packing.

- a] G. Filippini, A. Gavezzotti, *Acta Crystallogr.*, **1993**, B49, 868-880;  
b] A. Gavezzotti, G. Filippini, *J. Phys. Chem.*, **1994**, 98, 4831-4837; c] K. M. Sureshan, R. G. Gonnade, *Cryst. Eng. Comm.*, **2013**, 15, 1676-1679; d] C. F. Macrae, I. J. Bruno, J. A. Chisholm, P. R. Edgington, P. McCabe, E. Pidcock, L. Rodriguez-Monge, R. Taylor, J. van de Streek, P. A. Wood, *J. Appl. Crystallogr.*, **2008**, 41, 466-470.

### Cu estimation results:

- 1) Blank solution- Nil.
- 2) **B** (M:L :: 1:1) - 29.29 ppm in 20.3 mg **B**
- 3) **B** (M:L :: 0.25:1) - 27.26 ppm in 20.1 mg **B**

Average Cu required to get 70% yield of DNQM =  $28.275 \pm 1.015$  ppm  $\equiv$   $\sim 0.14\%$   
 $\therefore$  100 g DNQM  $\equiv$  0.14 g Cu or after 100 moles of DNQM 0.688 mole of Cu

### X-ray structural studies:

#### ORTEP of 1,1'-methide-bi-vitamin K<sub>3</sub> (DNQM) product (B)

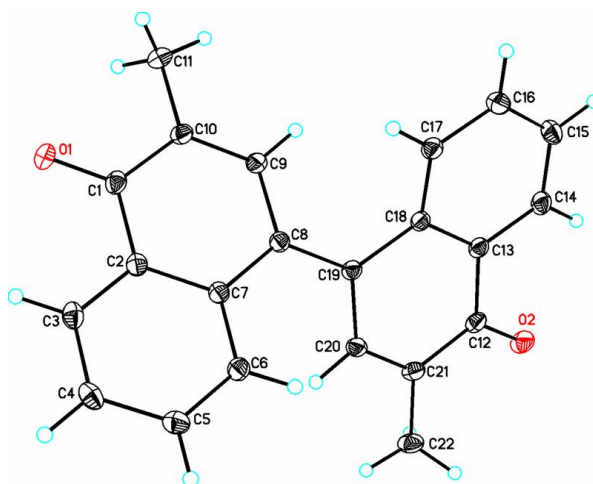

Mol. Wt.: 312.37 Mol Formula: C<sub>22</sub>H<sub>16</sub>O<sub>2</sub> M.P.=185 °C  
Molecular Composition: C 84.59 % , H 5.26 % , O 10.24 %

#### Elemental Analyses result of B:

| Element | % Expected | % Observed |
|---------|------------|------------|
| C       | 84.59      | 84.75      |
| H       | 5.26       | 5.45       |

### Computational / Theoretical studies:

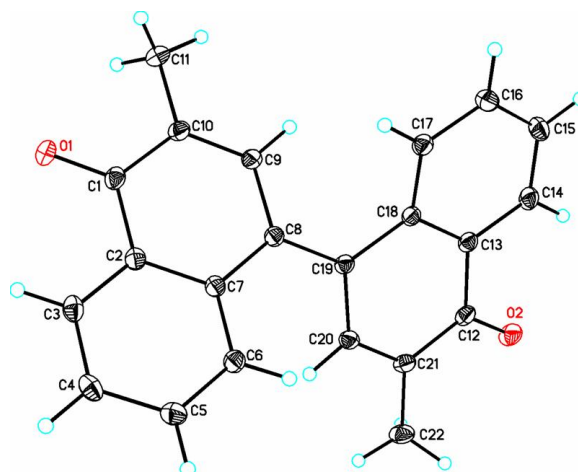

**Figure. S1:** The numbering schemes in **B**. Carbons are depicted in gray color, oxygens are red and hydrogens are cyan color.

Optimized structures from B3LYP/6-31G (d,p) theory.

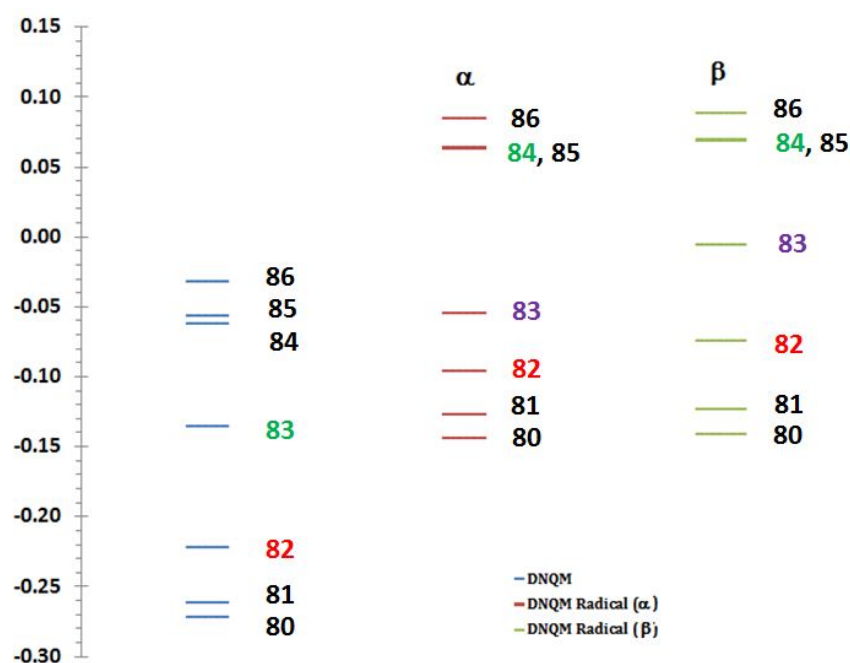

**Figure S2:** Correlation diagram between the energy eigenvalues of selected MOs calculated for DNQM and DNQM radical in their groundstates. The HOMO and LUMO of the **B** are represented by red and green colours, respectively. The SOMO of the **B** radical is represented by the lavender (83) colour.

| MO | B (neutral)                                                                         | B (radical)                                                                          |                                                                                       |
|----|-------------------------------------------------------------------------------------|--------------------------------------------------------------------------------------|---------------------------------------------------------------------------------------|
|    |                                                                                     | Alpha                                                                                | Beta                                                                                  |
| 80 | 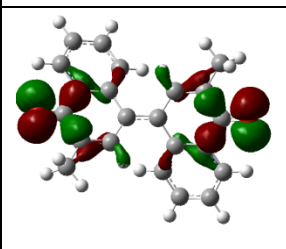   |    |    |
| 81 |    |    |    |
| 82 |   |   |   |
| 83 |  |  |  |
| 84 |  |  |  |
| 85 |  |  |  |

**Figure S3:** The MOs in **B** (neutral) and **B** (radical) forms.

| <b>Sr.</b> | <b>Atom</b> | <b>FC</b>   | <b>Sr.</b> | <b>Atom</b> | <b>FC</b>   |
|------------|-------------|-------------|------------|-------------|-------------|
| 1          | C           | -1.61       | <b>21</b>  | <b>C</b>    | <b>4.92</b> |
| 2          | C           | 1.51        | 22         | C           | -1.43       |
| 3          | C           | -1.27       | 23         | O           | -5.05       |
| 4          | C           | 1.78        | 24         | O           | -5.05       |
| 5          | C           | -0.83       | 25         | H           | 0.28        |
| 6          | C           | 1.25        | 26         | H           | -1.10       |
| 7          | C           | -1.45       | 27         | H           | 0.18        |
| <b>8</b>   | <b>C</b>    | <b>5.35</b> | 28         | H           | -0.90       |
| 9          | C           | -1.43       | 29         | H           | 0.19        |
| <b>10</b>  | <b>C</b>    | <b>4.92</b> | <b>30</b>  | <b>H</b>    | <b>3.45</b> |
| 11         | C           | -1.43       | <b>31</b>  | <b>H</b>    | <b>4.41</b> |
| 12         | C           | -1.61       | <b>32</b>  | <b>H</b>    | <b>0.03</b> |
| 13         | C           | 1.51        | 33         | H           | 0.28        |
| 14         | C           | -1.27       | 34         | H           | -1.10       |
| 15         | C           | 1.78        | 35         | H           | 0.18        |
| 16         | C           | -0.83       | 36         | H           | -0.90       |
| 17         | C           | 1.25        | 37         | H           | 0.19        |
| 18         | C           | -1.45       | <b>38</b>  | <b>H</b>    | <b>3.45</b> |
| <b>19</b>  | <b>C</b>    | <b>5.35</b> | <b>39</b>  | <b>H</b>    | <b>4.41</b> |
| 20         | C           | -1.43       | <b>40</b>  | <b>H</b>    | <b>0.03</b> |

**Table S2:** The Fermi contact coupling constant (FC) (in G) for atoms in the radical form.

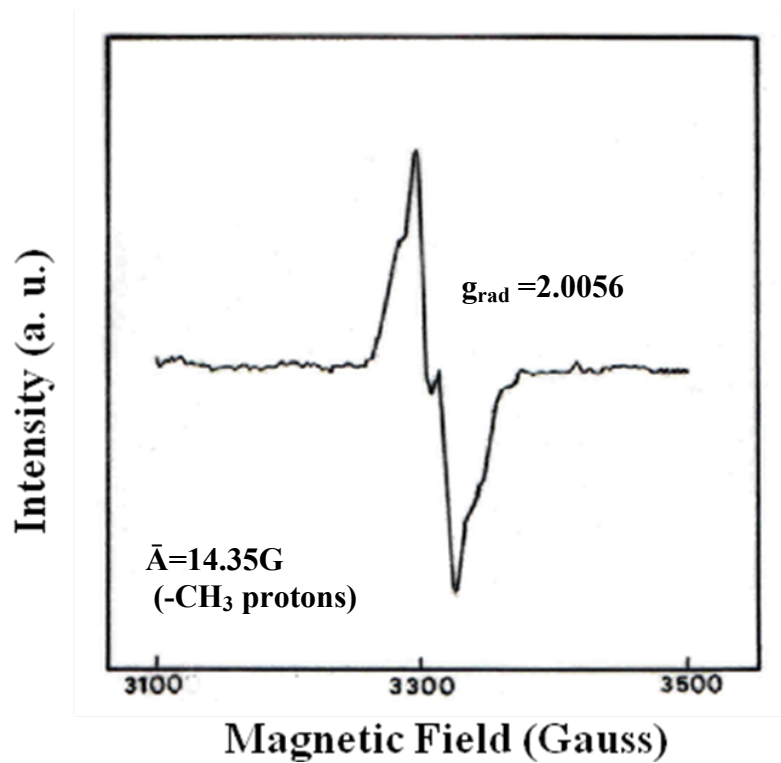

**Figure S4:** Frozen glass X-band ESR spectrum of **B** in DMSO at 70 K.



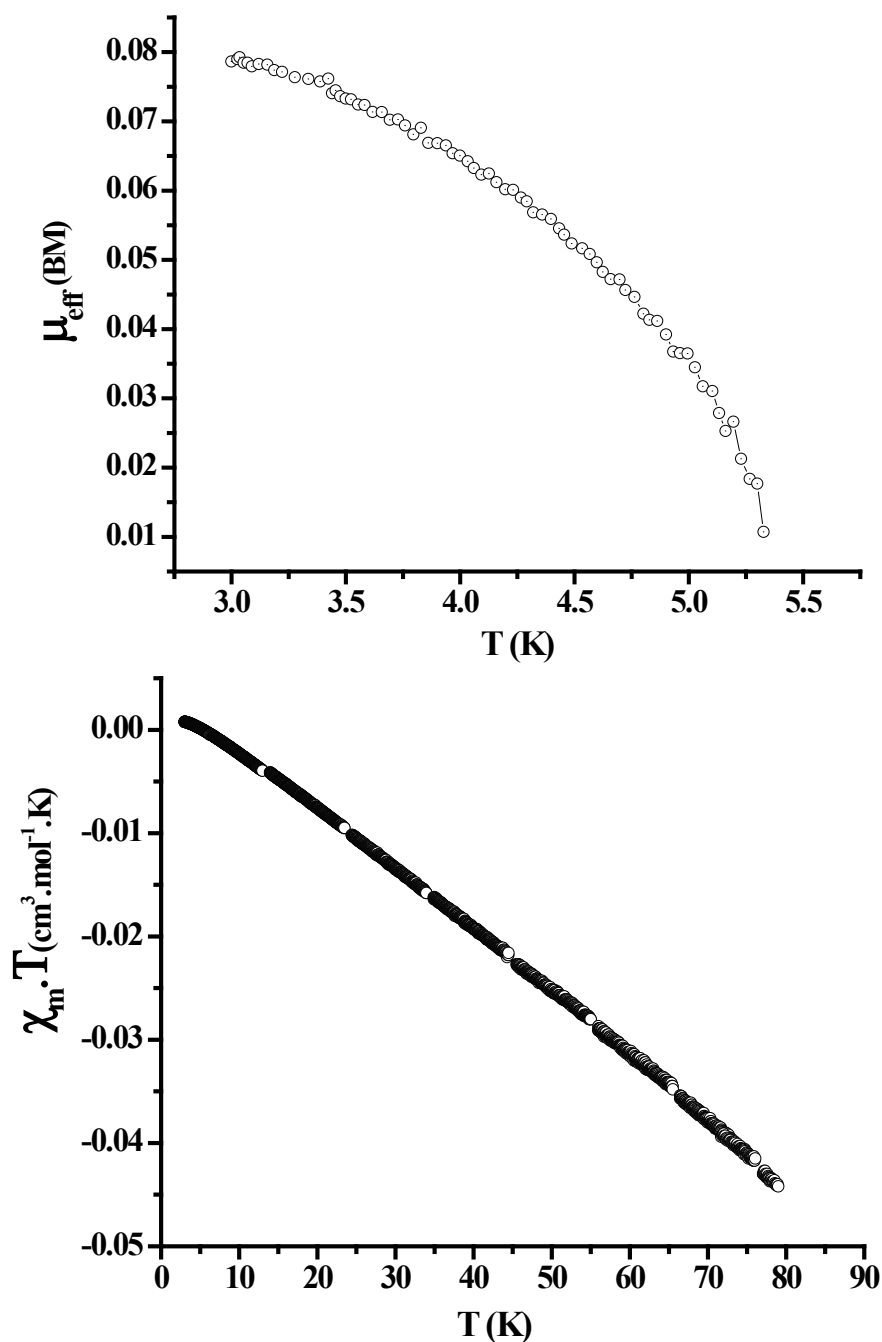

**Figure S5:** (a) Plot of  $\mu_{\text{eff}}$  (BM) vs.  $T$  (K) and (b) Plot of  $\chi_m^{\text{corr}} \cdot T$  ( $\text{cm}^3 \text{mol}^{-1} \cdot \text{K}$ ) vs.  $T$  (K) of **B**.

The  $\mu_{\text{eff}}$  at 3K is  $\sim 0.08$  B.M. at 1T applied field which is nearly half of phthiocoloxime<sup>[24]</sup>. Such radical dimers showing weak ferromagnetic behavior at liq. He temperature are reported by Palacio *et. al* and Murphy *et. al* ( A.J. Banister, N. Bricklebank, I. Lavender, J.M. Rawson, C.I. Gregory, B.K. Tanner, W. Clegg, M.R.J. Elesgood, F. Palacio, *Angew. Chem. Int. Ed. Engl.* 1996, **35**, 2533, A. Alberola, R.J. Less, C.M. Pask, J.M. Rawson, F. Palacio, P. Oliete, C. Paulsen, A. Yamaguchi, R. Farley, D.M. Murphy, *Angew. Chem. Int. Ed. Engl.* 2003, 42, 4782). **S9**
